# Supplementary material for: Machine learning transferable atomic forces for large systems from underconverged molecular fragments
Source: Royal Society of Chemistry journal article supplement (doi:10.1039/d2cp05976b), 2023-01-01
Supplement: d2cp05976b1.pdf [file d2cp05976b1.pdf]

## Machine learning transferable atomic forces for large systems from underconverged molecular fragments

### S-I Fragment Radii for Atomic IRMOF Positions

The range of atomic interactions for the different atomic sites with the surrounding atoms present in the IRMOF bulk structures (Fig. 2) can be analyzed employing the Hessian<sup>47</sup>. The Hessian contains the derivatives of the atomic forces with respect to all atomic positions, which can be used to determine environment radii for all atomic sites (Tab. SI). For each atomic site, i.e., the central atom, a molecular fragment can be constructed based on the fragment radius. Within the molecular fragments, the specific central atoms are embedded in a bulk like environment up to the given fragment radius. Consequently, the atomic forces of the central atoms are converged to the bulk force values. To ensure the atomic force convergence of every atomic site and an equivalent description of the atomic environments, the largest fragment radius as a worst case scenario forms the basis of the non-redundant set of molecular fragments (Fig. 4).

Table SI Fragment radii  $R_{\text{frag}}$  in Å obtained by the Hessian-based determination of the atomic interactions<sup>47</sup> for the atomic sites present in the IRMOF bulk structures. Dashes indicate atomic sites, which are not present in the respective IRMOFs. For site H2 in IRMOF-10, as well as for sites C5, H2 and H3 in IRMOF-16, the considered fragment (biphenyl) is already size-converged. For this reason, the fragment radii are small. Thus, a further reduction of the fragment size during the analysis is not required. The given fragment radii for these cases are given in italic.

| A   | IRMOF-1 | IRMOF-10     | IRMOF-16     |
|-----|---------|--------------|--------------|
| Zn1 | 4.333   | 4.328        | 4.333        |
| O1  | 5.165   | 5.160        | 5.158        |
| O2  | 2.379   | 2.376        | 2.375        |
| C1  | 8.502   | 8.718        | 6.316        |
| C2  | 7.304   | 4.328        | 4.327        |
| C3  | 3.817   | 3.830        | 3.827        |
| C4  | –       | 3.816        | 4.811        |
| C5  | –       | 4.364        | <i>1.492</i> |
| C6  | –       | –            | 4.389        |
| C7  | –       | –            | 3.830        |
| H1  | 2.725   | 2.731        | 2.730        |
| H2  | –       | <i>1.962</i> | <i>1.975</i> |
| H3  | –       | –            | <i>1.975</i> |

### S-II Atom-Centered Symmetry Functions (ACSFs)

Table SII Compilation of the radial atom-centered symmetry functions (ACSFs)<sup>64</sup> for the different element combinations employed for the construction of HDNNP1 and HDNNP2.  $A$  defines the element of the atom at which the ACSF is centered and  $B$  the element of the neighboring atom. The  $\eta$  parameter defining the width of the Gaussian is given in  $a_0^{-2}$  with  $a_0$  being the Bohr radius. The cutoff radius  $R_c = 4.359 \text{ \AA}$  has been used.

| no. | carbon |    |        | oxygen |    |        | zinc |    |        | hydrogen |   |        |
|-----|--------|----|--------|--------|----|--------|------|----|--------|----------|---|--------|
|     | A      | B  | $\eta$ | A      | B  | $\eta$ | A    | B  | $\eta$ | A        | B | $\eta$ |
| 1   | C      | H  | 0.000  | O      | H  | 0.000  | Zn   | C  | 0.000  | H        | H | 0.000  |
| 2   | C      | C  | 0.000  | O      | C  | 0.000  | Zn   | O  | 0.000  | H        | C | 0.000  |
| 3   | C      | O  | 0.000  | O      | O  | 0.000  | Zn   | Zn | 0.000  | H        | O | 0.000  |
| 4   | C      | Zn | 0.000  | O      | Zn | 0.000  | Zn   | Zn | 0.001  | H        | C | 0.007  |
| 5   | C      | Zn | 0.002  | O      | O  | 0.003  | Zn   | C  | 0.002  | H        | O | 0.010  |
| 6   | C      | Zn | 0.003  | O      | Zn | 0.004  | Zn   | Zn | 0.002  | H        | H | 0.014  |
| 7   | C      | Zn | 0.005  | O      | C  | 0.006  | Zn   | C  | 0.003  | H        | C | 0.020  |
| 8   | C      | C  | 0.006  | O      | O  | 0.007  | Zn   | Zn | 0.003  | H        | O | 0.041  |
| 9   | C      | O  | 0.006  | O      | Zn | 0.009  | Zn   | O  | 0.004  | H        | C | 0.053  |
| 10  | C      | H  | 0.007  | O      | H  | 0.010  | Zn   | Zn | 0.004  | H        | H | 0.079  |
| 11  | C      | Zn | 0.007  | O      | O  | 0.013  | Zn   | C  | 0.005  | H        | C | 0.182  |
| 12  | C      | C  | 0.015  | O      | C  | 0.016  | Zn   | C  | 0.007  |          |   |        |
| 13  | C      | O  | 0.016  | O      | Zn | 0.017  | Zn   | O  | 0.009  |          |   |        |
| 14  | C      | H  | 0.020  | O      | O  | 0.021  | Zn   | O  | 0.017  |          |   |        |
| 15  | C      | C  | 0.034  | O      | Zn | 0.031  | Zn   | O  | 0.031  |          |   |        |
| 16  | C      | O  | 0.039  | O      | C  | 0.039  |      |    |        |          |   |        |
| 17  | C      | H  | 0.053  | O      | H  | 0.041  |      |    |        |          |   |        |
| 18  | C      | C  | 0.084  | O      | C  | 0.106  |      |    |        |          |   |        |
| 19  | C      | O  | 0.106  |        |    |        |      |    |        |          |   |        |
| 20  | C      | H  | 0.182  |        |    |        |      |    |        |          |   |        |

Table SIII Compilation of the angular atom-centered symmetry functions (ACSFs)<sup>64</sup> for the different element combinations employed in the construction of HDNNP1 and HDNNP2. *A* defines the element of the atom at which the ACSF is centered, while *B* and *C* specify the elements of the neighboring atoms. The  $\eta$  parameter defining the width of the Gaussian has been set to zero, and the cutoff radius is  $R_c = 4.359 \text{ \AA}$ . The set of angular ACSFs of each element combination consists of all permutations of the parameter  $\zeta \in \{1, 2, 4, 16\}$ , defining the width of the angular part (see Ref. 64) and the parameter  $\lambda \in \{-1, 1\}$  controlling the positions of the maxima. For the element combinations C-Zn-Zn, Zn-C-C, Zn-C-Zn, Zn-O-Zn and Zn-Zn-Zn the angular ACSF with the parameter combination of  $\zeta = 16$  and  $\lambda = -1$  are not included.

| no. | carbon   |          |          | oxygen   |          |          | zinc     |          |          | hydrogen |          |          |
|-----|----------|----------|----------|----------|----------|----------|----------|----------|----------|----------|----------|----------|
|     | <i>A</i> | <i>B</i> | <i>C</i> |
| 1   | C        | H        | H        | O        | H        | C        | Zn       | C        | C        | H        | H        | C        |
| 2   | C        | H        | C        | O        | H        | O        | Zn       | C        | O        | H        | C        | C        |
| 3   | C        | H        | O        | O        | C        | C        | Zn       | C        | Zn       | H        | C        | O        |
| 4   | C        | H        | Zn       | O        | C        | O        | Zn       | O        | O        | H        | O        | O        |
| 5   | C        | C        | C        | O        | C        | Zn       | Zn       | O        | Zn       |          |          |          |
| 6   | C        | C        | O        | O        | O        | O        | Zn       | Zn       | Zn       |          |          |          |
| 7   | C        | C        | Zn       | O        | O        | Zn       |          |          |          |          |          |          |
| 8   | C        | O        | O        | O        | Zn       | Zn       |          |          |          |          |          |          |
| 9   | C        | O        | Zn       |          |          |          |          |          |          |          |          |          |
| 10  | C        | Zn       | Zn       |          |          |          |          |          |          |          |          |          |

Table SIV Compilation of the radial atom-centered symmetry functions (ACSFs) for the different element combinations of the ACSF set for HDNNP3.  $A$  defines the element of the atom at which the ACSF is centered and  $B$  the element of the neighboring atom. The  $\eta$  parameter defining the width of the Gaussian is given in  $a_0^{-2}$  with the cutoff radius  $R_c = 8.718 \text{ \AA} = 16.475 a_0$ ,  $a_0$  being the Bohr radius.

| no. | $A$ | $B$ | $\eta$ |
|-----|-----|-----|--------|-----|-----|--------|-----|-----|--------|-----|-----|--------|
| 1   | C   | H   | 0.000  | O   | H   | 0.000  | Zn  | C   | 0.000  | H   | H   | 0.000  |
| 2   | C   | C   | 0.000  | O   | C   | 0.000  | Zn  | O   | 0.000  | H   | C   | 0.000  |
| 3   | C   | O   | 0.000  | O   | O   | 0.000  | Zn  | Zn  | 0.000  | H   | O   | 0.000  |
| 4   | C   | Zn  | 0.000  | O   | Zn  | 0.000  | Zn  | C   | 0.001  | H   | C   | 0.001  |
| 5   | C   | H   | 0.001  | O   | C   | 0.001  | Zn  | O   | 0.001  | H   | C   | 0.002  |
| 6   | C   | C   | 0.001  | O   | O   | 0.001  | Zn  | Zn  | 0.001  | H   | C   | 0.003  |
| 7   | C   | O   | 0.001  | O   | Zn  | 0.001  | Zn  | C   | 0.002  | H   | C   | 0.004  |
| 8   | C   | Zn  | 0.001  | O   | C   | 0.002  | Zn  | O   | 0.002  | H   | C   | 0.006  |
| 9   | C   | H   | 0.002  | O   | O   | 0.002  | Zn  | Zn  | 0.002  | H   | C   | 0.007  |
| 10  | C   | C   | 0.002  | O   | Zn  | 0.002  | Zn  | C   | 0.003  | H   | H   | 0.010  |
| 11  | C   | O   | 0.002  | O   | C   | 0.003  | Zn  | O   | 0.003  | H   | C   | 0.010  |
| 12  | C   | Zn  | 0.002  | O   | O   | 0.003  | Zn  | Zn  | 0.003  | H   | C   | 0.012  |
| 13  | C   | H   | 0.003  | O   | Zn  | 0.003  | Zn  | C   | 0.004  | H   | O   | 0.013  |
| 14  | C   | C   | 0.003  | O   | C   | 0.004  | Zn  | O   | 0.004  | H   | C   | 0.016  |
| 15  | C   | O   | 0.003  | O   | O   | 0.004  | Zn  | Zn  | 0.004  | H   | C   | 0.021  |
| 16  | C   | Zn  | 0.003  | O   | Zn  | 0.004  | Zn  | C   | 0.005  | H   | C   | 0.027  |
| 17  | C   | H   | 0.004  | O   | C   | 0.005  | Zn  | O   | 0.005  | H   | C   | 0.036  |
| 18  | C   | C   | 0.004  | O   | O   | 0.005  | Zn  | Zn  | 0.005  | H   | C   | 0.049  |
| 19  | C   | O   | 0.004  | O   | Zn  | 0.005  | Zn  | C   | 0.006  | H   | C   | 0.070  |
| 20  | C   | Zn  | 0.004  | O   | O   | 0.006  | Zn  | O   | 0.006  | H   | H   | 0.082  |
| 21  | C   | C   | 0.005  | O   | Zn  | 0.006  | Zn  | Zn  | 0.006  | H   | C   | 0.102  |
| 22  | C   | O   | 0.005  | O   | C   | 0.007  | Zn  | C   | 0.007  | H   | C   | 0.161  |
| 23  | C   | Zn  | 0.005  | O   | O   | 0.007  | Zn  | O   | 0.007  | H   | O   | 0.194  |
| 24  | C   | H   | 0.006  | O   | Zn  | 0.007  | Zn  | Zn  | 0.007  |     |     |        |
| 25  | C   | C   | 0.006  | O   | O   | 0.008  | Zn  | C   | 0.008  |     |     |        |
| 26  | C   | Zn  | 0.006  | O   | Zn  | 0.008  | Zn  | O   | 0.008  |     |     |        |
| 27  | C   | H   | 0.007  | O   | C   | 0.009  | Zn  | Zn  | 0.008  |     |     |        |
| 28  | C   | O   | 0.007  | O   | O   | 0.009  | Zn  | C   | 0.009  |     |     |        |
| 29  | C   | Zn  | 0.007  | O   | O   | 0.010  | Zn  | Zn  | 0.009  |     |     |        |
| 30  | C   | C   | 0.008  | O   | Zn  | 0.010  | Zn  | C   | 0.010  |     |     |        |
| 31  | C   | Zn  | 0.008  | O   | C   | 0.011  | Zn  | O   | 0.010  |     |     |        |
| 32  | C   | O   | 0.009  | O   | O   | 0.011  | Zn  | Zn  | 0.010  |     |     |        |
| 33  | C   | Zn  | 0.009  | O   | O   | 0.012  | Zn  | C   | 0.011  |     |     |        |
| 34  | C   | H   | 0.010  | O   | Zn  | 0.012  | Zn  | Zn  | 0.011  |     |     |        |
| 35  | C   | C   | 0.010  | O   | H   | 0.013  | Zn  | C   | 0.012  |     |     |        |
| 36  | C   | Zn  | 0.010  | O   | C   | 0.014  | Zn  | O   | 0.012  |     |     |        |
| 37  | C   | O   | 0.011  | O   | O   | 0.015  | Zn  | Zn  | 0.012  |     |     |        |
| 38  | C   | Zn  | 0.011  | O   | Zn  | 0.015  | Zn  | C   | 0.013  |     |     |        |
| 39  | C   | H   | 0.012  | O   | C   | 0.018  | Zn  | Zn  | 0.013  |     |     |        |
| 40  | C   | Zn  | 0.012  | O   | O   | 0.018  | Zn  | C   | 0.014  |     |     |        |

Table SV Continuation of Table SIV.

| no. | A | B  | $\eta$ | A | B  | $\eta$ | A  | B  | $\eta$ | A | B | $\eta$ |
|-----|---|----|--------|---|----|--------|----|----|--------|---|---|--------|
| 41  | C | C  | 0.013  | O | Zn | 0.018  | Zn | Zn | 0.014  |   |   |        |
| 42  | C | Zn | 0.013  | O | O  | 0.021  | Zn | O  | 0.015  |   |   |        |
| 43  | C | O  | 0.014  | O | Zn | 0.022  | Zn | Zn | 0.015  |   |   |        |
| 44  | C | Zn | 0.014  | O | C  | 0.023  | Zn | C  | 0.016  |   |   |        |
| 45  | C | H  | 0.016  | O | O  | 0.025  | Zn | Zn | 0.016  |   |   |        |
| 46  | C | C  | 0.016  | O | Zn | 0.028  | Zn | C  | 0.018  |   |   |        |
| 47  | C | Zn | 0.016  | O | C  | 0.030  | Zn | O  | 0.018  |   |   |        |
| 48  | C | O  | 0.018  | O | Zn | 0.034  | Zn | O  | 0.022  |   |   |        |
| 49  | C | Zn | 0.018  | O | C  | 0.039  | Zn | O  | 0.028  |   |   |        |
| 50  | C | H  | 0.021  | O | Zn | 0.044  | Zn | O  | 0.034  |   |   |        |
| 51  | C | C  | 0.021  | O | C  | 0.052  | Zn | O  | 0.044  |   |   |        |
| 52  | C | O  | 0.023  | O | C  | 0.073  |    |    |        |   |   |        |
| 53  | C | H  | 0.027  | O | C  | 0.105  |    |    |        |   |   |        |
| 54  | C | C  | 0.027  | O | H  | 0.194  |    |    |        |   |   |        |
| 55  | C | O  | 0.030  |   |    |        |    |    |        |   |   |        |
| 56  | C | C  | 0.035  |   |    |        |    |    |        |   |   |        |
| 57  | C | H  | 0.036  |   |    |        |    |    |        |   |   |        |
| 58  | C | O  | 0.039  |   |    |        |    |    |        |   |   |        |
| 59  | C | C  | 0.046  |   |    |        |    |    |        |   |   |        |
| 60  | C | H  | 0.049  |   |    |        |    |    |        |   |   |        |
| 61  | C | O  | 0.052  |   |    |        |    |    |        |   |   |        |
| 62  | C | C  | 0.062  |   |    |        |    |    |        |   |   |        |
| 63  | C | H  | 0.070  |   |    |        |    |    |        |   |   |        |
| 64  | C | O  | 0.073  |   |    |        |    |    |        |   |   |        |
| 65  | C | C  | 0.086  |   |    |        |    |    |        |   |   |        |
| 66  | C | H  | 0.102  |   |    |        |    |    |        |   |   |        |
| 67  | C | O  | 0.105  |   |    |        |    |    |        |   |   |        |
| 68  | C | H  | 0.161  |   |    |        |    |    |        |   |   |        |

Table SVI Compilation of the angular atom-centered symmetry functions (ACSFs) for the different element combinations in HDNNP3. *A* defines the element of the atom at which the ACSF is centered, *B* and *C* the element of the neighboring atoms. The  $\eta$  parameter defining the width of the Gaussian is defined as  $\eta = 0.000a_0^{-2}$ . There are two shells of angular ACSF: one shell is similar to HDNNP1/HDNNP2 (Tab.SIII) with the cutoff radius  $R_c = 4.359\text{\AA} = 8.237a_0$  and a second shell with the cutoff radius  $R_c = 8.718\text{\AA} = 16.475a_0$ . The set of angular ACSF of each element combination is expanded by all different combinations of the parameter  $\zeta \in \{1, 2, 4, 16\}$ , defining the width of the angular part and the parameter  $\lambda \in \{-1, 1\}$ . For the element combinations C-Zn-Zn, O-O-O, Zn-C-C, Zn-C-Zn, Zn-O-Zn, Zn-Zn-Zn and H-O-O the angular ACSFs with the parameter combination of  $\zeta = 16$  and  $\lambda = -1$  are not included.

| no. | A | B  | C  | A | B  | C  | A  | B  | C  | A | B | C |
|-----|---|----|----|---|----|----|----|----|----|---|---|---|
| 1   | C | H  | H  | O | H  | C  | Zn | C  | C  | H | H | C |
| 2   | C | H  | C  | O | H  | O  | Zn | C  | O  | H | C | C |
| 3   | C | H  | O  | O | C  | C  | Zn | C  | Zn | H | C | O |
| 4   | C | H  | Zn | O | C  | O  | Zn | O  | O  | H | O | O |
| 5   | C | C  | C  | O | C  | Zn | Zn | O  | Zn |   |   |   |
| 6   | C | C  | O  | O | O  | O  | Zn | Zn | Zn |   |   |   |
| 7   | C | C  | Zn | O | O  | Zn |    |    |    |   |   |   |
| 8   | C | O  | O  | O | Zn | Zn |    |    |    |   |   |   |
| 9   | C | O  | Zn |   |    |    |    |    |    |   |   |   |
| 10  | C | Zn | Zn |   |    |    |    |    |    |   |   |   |
